# Supplementary material for: Co-exfoliation and fabrication of graphene based microfibrillated cellulose composites – mechanical and thermal stability and functional conductive properties
Source: Royal Society of Chemistry journal article supplement (doi:10.1039/c8nr02052c), 2018-01-01
Supplement: c8nr02052c1.pdf [file c8nr02052c1.pdf]

## **Supplementary information**

# **Co-exfoliation and Fabrication of Graphene Based Microfibrillated Cellulose Composites - Mechanical, Thermal Stability and Functional Conductive Properties**

*Josphat Phiri<sup>1\*</sup>; Leena-Sisko Johansson<sup>1</sup>; Patrick Gane<sup>1, 2</sup>; Thad C. Maloney<sup>1\*</sup>*

<sup>1</sup>School of Chemical Engineering, Department of Bioproducts and Biosystems, Aalto University,  
P.O. Box 16300, 00076 Aalto, Finland

<sup>2</sup>Omya International AG, CH-4665 Oftringen, Switzerland

\*Corresponding Authors: [josphat.phiri@aalto.fi](mailto:josphat.phiri@aalto.fi) (J. Phiri); [patrick.gane@omya.com](mailto:patrick.gane@omya.com) (P. Gane);  
[thaddeus.maloney@aalto.fi](mailto:thaddeus.maloney@aalto.fi) (T. Maloney)

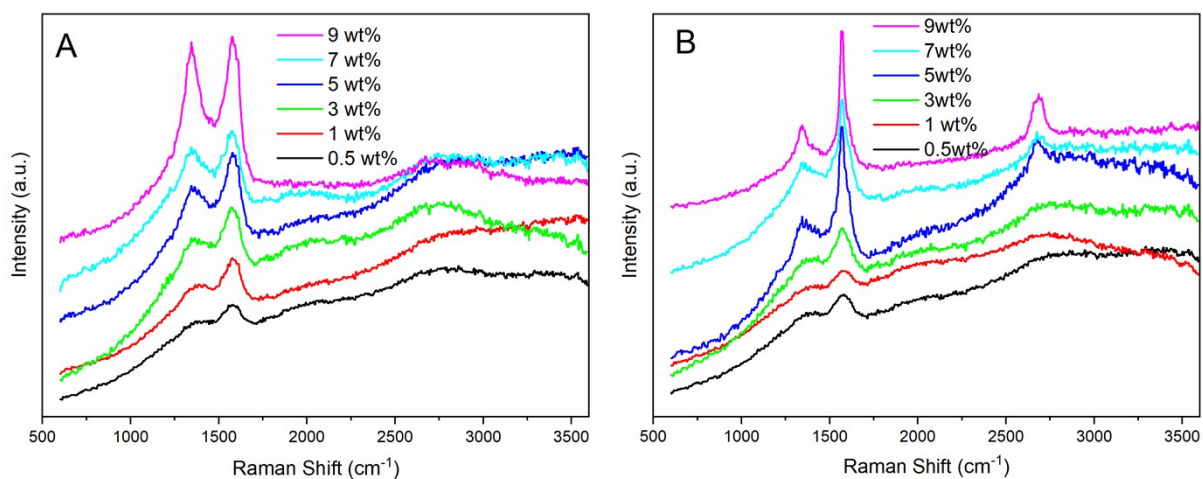

Figure S1 Raman analysis of (A) MFC/RGO and (B) MFC/graphene composites at different filler loadings

Table S1 Raman parameters of the graphite and RGO powders together with their respective composites

| Filler loading | MFC/graphene               |                |                            |                |           | MFC/RGO                    |                |                            |                |           |
|----------------|----------------------------|----------------|----------------------------|----------------|-----------|----------------------------|----------------|----------------------------|----------------|-----------|
|                | D-band                     |                | D-band                     |                | $I_D/I_G$ | D-band                     |                | G-band                     |                | $I_D/I_G$ |
|                | Position /cm <sup>-1</sup> | Intensity /a.u | Position /cm <sup>-1</sup> | Intensity /a.u |           | Position /cm <sup>-1</sup> | Intensity /a.u | Position /cm <sup>-1</sup> | Intensity /a.u |           |
| 5 wt%          | 1 342.61                   | 110.41         | 1 574.90                   | 296.38         | 0.37      | 1 362.23                   | 307.30         | 1 591.59                   | 494.62         | 0.62      |
| 7 wt%          | 1 340.16                   | 147.01         | 1 570.13                   | 409.53         | 0.36      | 1 362.23                   | 350.59         | 1 574.90                   | 445.95         | 0.79      |
| 9 wt%          | 1 345.07                   | 164.27         | 1 567.75                   | 618.55         | 0.27      | 1 337.70                   | 349.75         | 1 577.29                   | 405.98         | 0.86      |

Table S2 Comparative XPS data for graphite and RGO showing the presence of functional groups in RGO

| Samples  | Elemental composition, atomic% |      |     |     |     | Functional groups, atomic% |      |      |      |
|----------|--------------------------------|------|-----|-----|-----|----------------------------|------|------|------|
|          | C                              | O    | N   | S   | Si  | CC                         | CO   | COO  | COOO |
| RGO      | 79.5                           | 20.4 | 0.0 | 0.0 | 0.2 | 59.8                       | 21.6 | 10.6 | 7.9  |
| Graphite | 94.9                           | 4.5  | 0.6 | 0.0 | 0.0 | >98                        | -    | -    | -    |

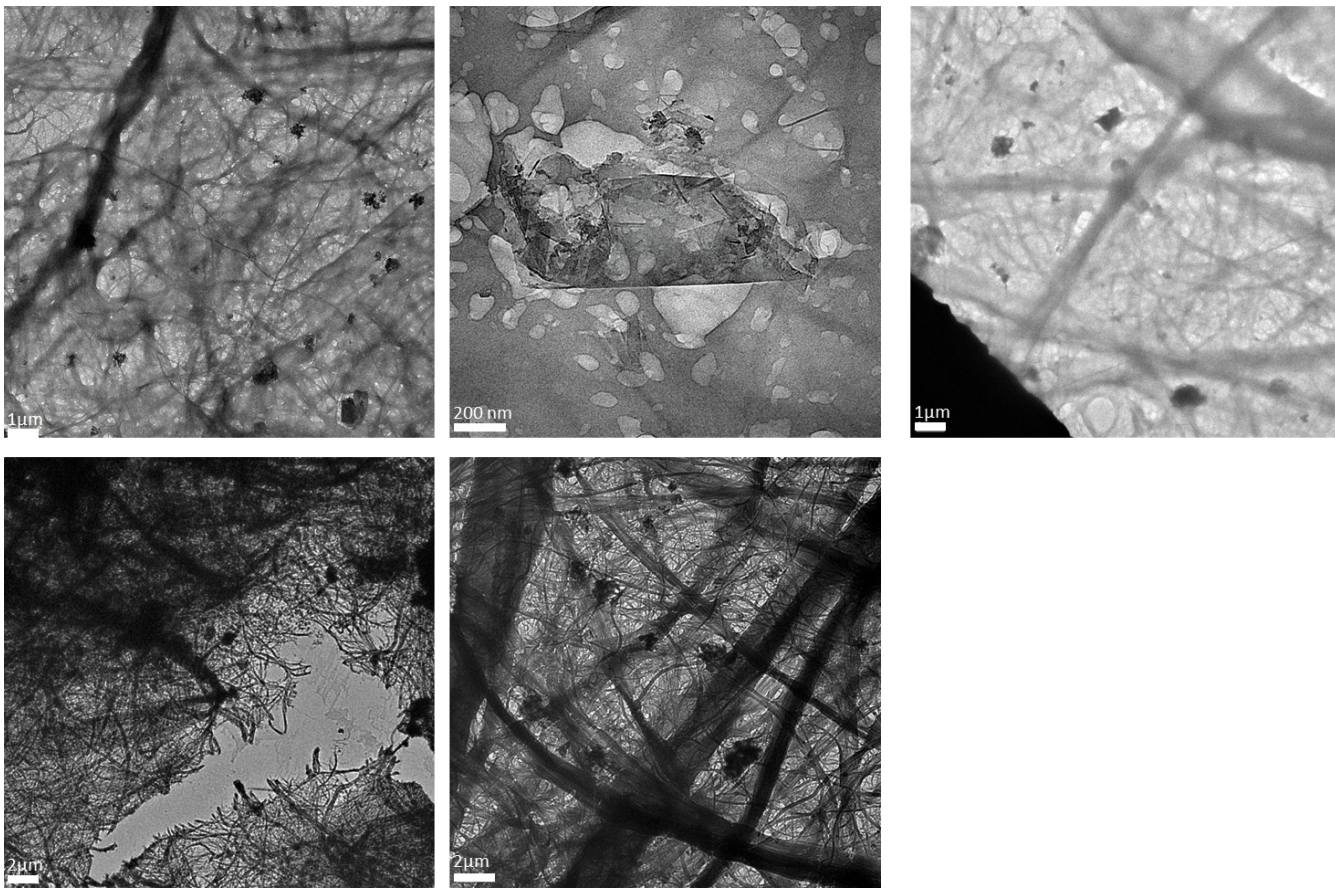

Figure S2 TEM images of graphene embedded in the MFC matrix.

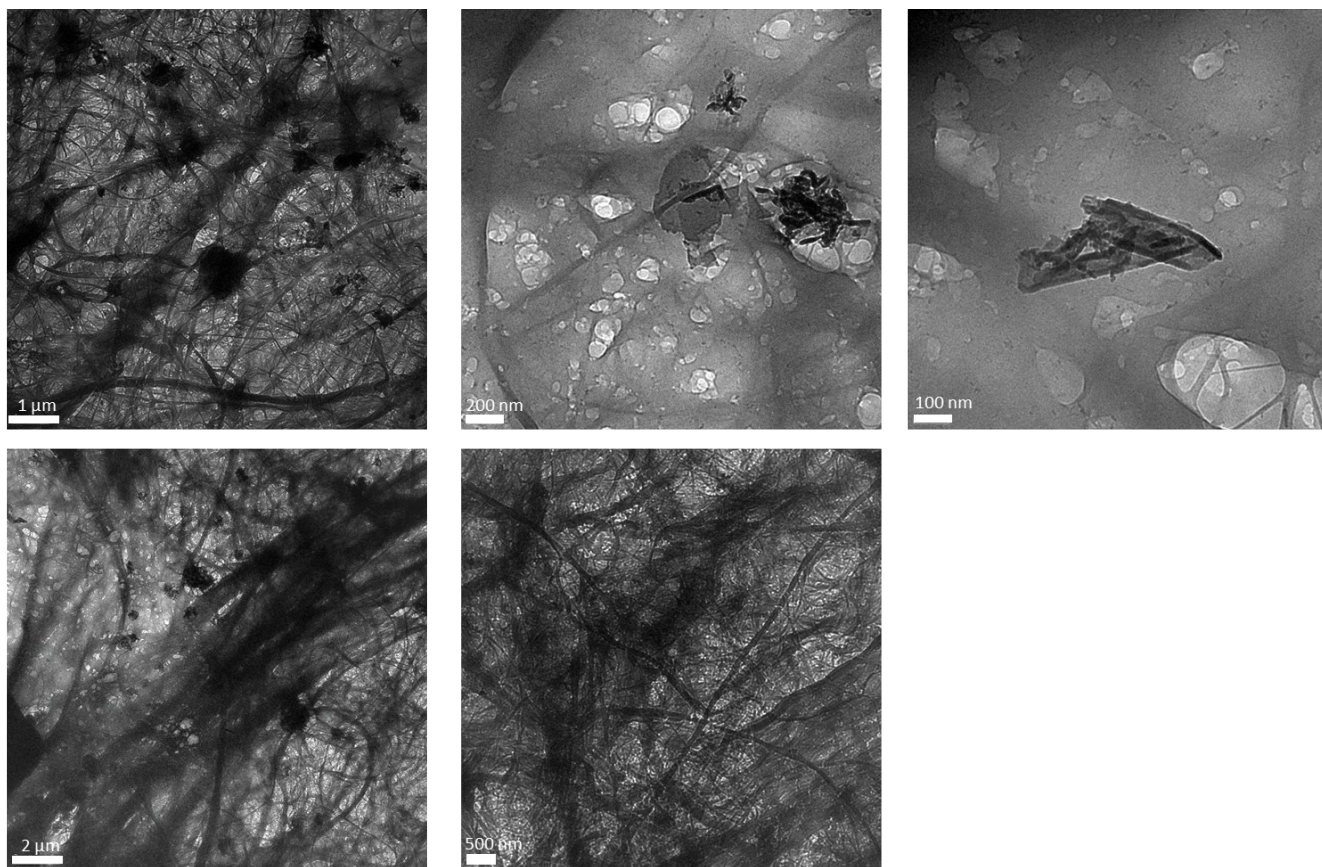

Figure S3 TEM images of RGO embedded in the MFC matrix.
